# Supplementary material for: A re-evaluation of the Italian historical geomagnetic catalogue: implications for paleomagnetic dating at active Italian volcanoes
Source: Copernicus journal article supplement (doi:10.5194/se-2-65-2011), 2011-06-09
Supplement: Supplementary file 1 [file varsec-DatabaseS1.xls]

## Sheet: Foglio1
site	lat	long	year	dec	inc
Ancona	43.603	13.507	1497	12
Ancona	43.603	13.507	1812	-17.65
Ancona	43.603	13.507	1818	-18.15
Ancona	43.603	13.507	1855	-13.66	60.89
Ancona	43.603	13.507	1873	-11.51
Ancona	43.603	13.507	1882	-11	59.8
Ancona	43.603	13.507	1888	-10.5	59.76
Ancona	43.603	13.507	1890	-10.29	59.67
Ancona	43.603	13.507	1921	-6.63	59.17
Bologna	44.497	11.339	1640	3
Bologna	44.497	11.339	1657	-1
Bologna	44.497	11.339	1696	-7
Bologna	44.497	11.339	1733	-14
Bologna	44.497	11.339	1750	-16.9
Bologna	44.497	11.339	1783	-17.3
Bologna	44.497	11.339	1784	-17.7
Bologna	44.497	11.339	1787	-18
Bologna	44.497	11.339	1788	-18.2
Bologna	44.497	11.339	1789	-18.2
Bologna	44.497	11.339	1790	-18.2
Bologna	44.497	11.339	1791	-18.3
Bologna	44.497	11.339	1792	-18.4
Bologna	44.497	11.339	1805		64.8
Bologna	44.497	11.339	1812	-19.35
Bologna	44.497	11.339	1856	-15.28
Bologna	44.497	11.339	1857	-14.92
Bologna	44.497	11.339	1859	-14.94
Bologna	44.497	11.339	1868		61.34
Bologna	44.497	11.339	1890	-11.4	60.71
Brindisi	40.632	17.945	1823	-14.58
Brindisi	40.632	17.945	1855	-11.85	57.15
Brindisi	40.632	17.945	1870	-10.1
Brindisi	40.632	17.945	1873	-9.89
Brindisi	40.632	17.945	1886	-9.01	56.18
Brindisi	40.632	17.945	1890	-8.62	56.12
Brindisi	40.632	17.945	1922	-4.92	55.83
Castellaccio	44.429	8.933	1933	-7.17667
Castellaccio	44.429	8.933	1934	-7.01667
Castellaccio	44.429	8.933	1935	-6.85333
Castellaccio	44.429	8.933	1936	-6.70167
Castellaccio	44.429	8.933	1937	-6.55167
Castellaccio	44.429	8.933	1938	-6.41667
Castellaccio	44.429	8.933	1939	-6.26
Castellaccio	44.429	8.933	1940	-6.12
Castellaccio	44.429	8.933	1941	-5.965
Castellaccio	44.429	8.933	1942	-5.85
Castellaccio	44.429	8.933	1943	-5.72667
Castellaccio	44.429	8.933	1944	-5.585
Castellaccio	44.429	8.933	1945	-5.46333
Castellaccio	44.429	8.933	1946	-5.32667
Castellaccio	44.429	8.933	1947	-5.18333
Castellaccio	44.429	8.933	1948	-5.04167
Castellaccio	44.429	8.933	1949	-4.915
Castellaccio	44.429	8.933	1950	-4.795
Castellaccio	44.429	8.933	1951	-4.665
Castellaccio	44.429	8.933	1952	-4.535
Castellaccio	44.429	8.933	1953	-4.42333
Castellaccio	44.429	8.933	1954	-4.31833
Castellaccio	44.429	8.933	1955	-4.21167
Castellaccio	44.429	8.933	1956	-4.10167
Castellaccio	44.429	8.933	1957	-3.99667
Castellaccio	44.429	8.933	1958	-3.90833
Castellaccio	44.429	8.933	1959	-3.82
Castellaccio	44.429	8.933	1960	-3.73833
Castellaccio	44.429	8.933	1961	-3.66
Castellaccio	44.429	8.933	1962	-3.58167
Catania	37.5	15.087	1640	6
Catania	37.5	15.087	1829	-16.47
Catania	37.5	15.087	1839	-14.6
Catania	37.5	15.087	1841	-15.29
Catania	37.5	15.087	1842	-15.08
Catania	37.5	15.087	1843	-15.01
Catania	37.5	15.087	1843	-15.6	54.25
Catania	37.5	15.087	1882	-11.34	54.29
Catania	37.5	15.087	1882	-11.3	54.17
Catania	37.5	15.087	1882	-11.48	54.4
Catania	37.5	15.087	1891	-9.66	52.29
Catania	37.5	15.087	1896	-10.42
Firenze	43.777	11.248	1537	9
Firenze	43.777	11.248	1550	7
Firenze	43.777	11.248	1640	3
Firenze	43.777	11.248	1806		63.95
Firenze	43.777	11.248	1809	-17.68
Firenze	43.777	11.248	1826		62.93
Firenze	43.777	11.248	1831	-16.58	62.38
Firenze	43.777	11.248	1832		62.97
Firenze	43.777	11.248	1835		63.43
Firenze	43.777	11.248	1838		62.35
Firenze	43.777	11.248	1838		62.09
Firenze	43.777	11.248	1840		62.2
Firenze	43.777	11.248	1844	-16.4
Firenze	43.777	11.248	1845	-16.07
Firenze	43.777	11.248	1846	-16.1
Firenze	43.777	11.248	1846	-15.97
Firenze	43.777	11.248	1847	-16
Firenze	43.777	11.248	1848	-15.82
Firenze	43.777	11.248	1850	-15.65
Firenze	43.777	11.248	1851	-15.6
Firenze	43.777	11.248	1851	-15.25
Firenze	43.777	11.248	1852	-15.2
Firenze	43.777	11.248	1853	-15.08
Firenze	43.777	11.248	1854	-15.15
Firenze	43.777	11.248	1856	-14.85
Firenze	43.777	11.248	1857	-14.67
Firenze	43.777	11.248	1859	-14.57
Firenze	43.777	11.248	1859		61
Firenze	43.777	11.248	1868	-13.73	60.65
Firenze	43.777	11.248	1871	-13.73
Firenze	43.777	11.248	1871		60.24
Firenze	43.777	11.248	1875	-13.37	60.22
Firenze	43.777	11.248	1885	-11.76	60.13
Firenze	43.777	11.248	1887	-11.6	60.13
Genova	44.419	8.897	1640	6
Genova	44.419	8.897	1651	6
Genova	44.419	8.897	1698	-9
Genova	44.419	8.897	1805		64.65
Genova	44.419	8.897	1817	-20.78
Genova	44.419	8.897	1840		62.88
Genova	44.419	8.897	1846	-17.6	62.18
Genova	44.419	8.897	1886	-13.52	60.87
Genova	44.419	8.897	1887	-13.4	60.83
Genova	44.419	8.897	1892	-12.97	60.72
Genova	44.419	8.897	1924	-8.94	60.15
L'Aquila	42.383	13.317	1960	-1.55	58.52
L'Aquila	42.383	13.317	1961	-1.5	58.52
L'Aquila	42.383	13.317	1962	-1.42	58.5
L'Aquila	42.383	13.317	1963	-1.35	58.5
L'Aquila	42.383	13.317	1964	-1.28	58.49
L'Aquila	42.383	13.317	1965	-1.23	58.47
L'Aquila	42.383	13.317	1966	-1.17	58.47
L'Aquila	42.383	13.317	1967	-1.12	58.47
L'Aquila	42.383	13.317	1968	-1.07	58.47
L'Aquila	42.383	13.317	1969	-1.02	58.44
L'Aquila	42.383	13.317	1970	-0.97	58.43
L'Aquila	42.383	13.317	1971	-0.9	58.4
L'Aquila	42.383	13.317	1972	-0.85	58.39
L'Aquila	42.383	13.317	1973	-0.78	58.38
L'Aquila	42.383	13.317	1974	-0.7	58.38
L'Aquila	42.383	13.317	1975	-0.62	58.37
L'Aquila	42.383	13.317	1976	-0.53	58.35
L'Aquila	42.383	13.317	1977	-0.43	58.35
L'Aquila	42.383	13.317	1978	-0.33	58.37
L'Aquila	42.383	13.317	1979	-0.23	58.35
L'Aquila	42.383	13.317	1980	-0.13	58.35
L'Aquila	42.383	13.317	1981	-0.03	58.37
L'Aquila	42.383	13.317	1982	0.08	58.39
L'Aquila	42.383	13.317	1983	0.17	58.39
L'Aquila	42.383	13.317	1984	0.28	58.4
L'Aquila	42.383	13.317	1985	0.37	58.42
L'Aquila	42.383	13.317	1986	0.45	58.43
L'Aquila	42.383	13.317	1987	0.53	58.44
L'Aquila	42.383	13.317	1988	0.62	58.47
L'Aquila	42.383	13.317	1989	0.68	58.5
L'Aquila	42.383	13.317	1990	0.75	58.52
L'Aquila	42.383	13.317	1991	0.82	58.55
L'Aquila	42.383	13.317	1992	0.88	58.55
L'Aquila	42.383	13.317	1993	0.95	58.54
L'Aquila	42.383	13.317	1994	1.05	58.55
L'Aquila	42.383	13.317	1995	1.13	58.55
L'Aquila	42.383	13.317	1996	1.22	58.55
L'Aquila	42.383	13.317	1997	1.32	58.57
L'Aquila	42.383	13.317	1998	1.42	58.6
L'Aquila	42.383	13.317	1999	1.5	58.62
L'Aquila	42.383	13.317	2000	1.57	58.63
L'Aquila	42.383	13.317	2001	1.65	58.63
L'Aquila	42.383	13.317	2002	1.73	58.65
L'Aquila	42.383	13.317	2003	1.83	58.67
L'Aquila	42.383	13.317	2004	1.92	58.67
L'Aquila	42.383	13.317	2005	1.99	58.68
L'Aquila	42.383	13.317	2006	2.07	58.67
L'Aquila	42.383	13.317	2007	2.23	58.7053
L'Aquila	42.383	13.317	2008	2.31	58.7108
L'Aquila	42.383	13.317	2009	2.4	58.7198
Messina	38.2	15.549	1640	0
Messina	38.2	15.549	1815	-18.55
Messina	38.2	15.549	1829	-17.2	56.48
Messina	38.2	15.549	1834		56.16
Messina	38.2	15.549	1841		55.82
Messina	38.2	15.549	1848		55.47
Messina	38.2	15.549	1882	-10.38	53.88
Messina	38.2	15.549	1891	-9.41	53.74
Messina	38.2	15.549	1892	-9.28	53.7
Messina	38.2	15.549	1924	-5.59	53.06
Milano	45.464	9.189	1630	6
Milano	45.464	9.189	1640	3
Milano	45.464	9.189	1805		65.67
Milano	45.464	9.189	1825	-18.75
Milano	45.464	9.189	1831		64.25
Milano	45.464	9.189	1831	-20.05
Milano	45.464	9.189	1832		64.35
Milano	45.464	9.189	1835		63.97
Milano	45.464	9.189	1836	-18.72
Milano	45.464	9.189	1836	-18.75
Milano	45.464	9.189	1836	-18.77
Milano	45.464	9.189	1836	-18.76
Milano	45.464	9.189	1836	-18.77
Milano	45.464	9.189	1836	-18.41
Milano	45.464	9.189	1837	-18.59	63.75
Milano	45.464	9.189	1837	-18.58
Milano	45.464	9.189	1837	-18.57	63.78
Milano	45.464	9.189	1837	-18.53	63.8
Milano	45.464	9.189	1837	-18.54	63.79
Milano	45.464	9.189	1837	-18.52	63.79
Milano	45.464	9.189	1837	-18.54	63.77
Milano	45.464	9.189	1837	-18.54	63.76
Milano	45.464	9.189	1838	-18.54	63.85
Milano	45.464	9.189	1838	-18.56	63.81
Milano	45.464	9.189	1838	-18.55	63.79
Milano	45.464	9.189	1838	-18.54	63.93
Milano	45.464	9.189	1838	-18.54	63.94
Milano	45.464	9.189	1838	-18.58	63.99
Milano	45.464	9.189	1838	-18.58	64
Milano	45.464	9.189	1838	-18.55	63.93
Milano	45.464	9.189	1838	-18.22
Milano	45.464	9.189	1838		63.91
Milano	45.464	9.189	1838	-18.57
Milano	45.464	9.189	1839	-18.5	63.95
Milano	45.464	9.189	1839	-18.49	63.83
Milano	45.464	9.189	1839	-18.47	63.85
Milano	45.464	9.189	1843	-17.5
Milano	45.464	9.189	1847	-17	63.26
Milano	45.464	9.189	1847	-17.78	63.32
Milano	45.464	9.189	1859	-15.86	63.74
Milano	45.464	9.189	1864	-15.44	63.57
Milano	45.464	9.189	1868		62.45
Milano	45.464	9.189	1884	-13.04	62.07
Napoli	40.855	14.26	1640	0
Napoli	40.855	14.26	1829	-15.33	58.47
Napoli	40.855	14.26	1836	-15.33	58.88
Napoli	40.855	14.26	1838		59.09
Napoli	40.855	14.26	1840		58.98
Napoli	40.855	14.26	1840	-15.71	58.97
Napoli	40.855	14.26	1841	-15.56	58.83
Napoli	40.855	14.26	1842	-15.47	58.52
Napoli	40.855	14.26	1843		58.71
Napoli	40.855	14.26	1843	-15.23	58.62
Napoli	40.855	14.26	1844		58.6
Napoli	40.855	14.26	1844	-14.72
Napoli	40.855	14.26	1845	-14.66
Napoli	40.855	14.26	1846	-14.43
Napoli	40.855	14.26	1847	-14.19
Napoli	40.855	14.26	1859		58.15
Napoli	40.855	14.26	1860		57.82
Napoli	40.855	14.26	1864	-12.76	57.52
Napoli	40.855	14.26	1869	-10.45
Napoli	40.855	14.26	1871	-11.31
Napoli	40.855	14.26	1871	-11.6
Napoli	40.855	14.26	1871	-12	57.38
Napoli	40.855	14.26	1874	-12.76	57.51
Napoli	40.855	14.26	1875	-11.52	57.01
Napoli	40.855	14.26	1879	-10.96
Napoli	40.855	14.26	1881	-10.8
Napoli	40.855	14.26	1882		57
Napoli	40.855	14.26	1883	-10.63	56.94
Napoli	40.855	14.26	1884	-10.52
Napoli	40.855	14.26	1884		56.89
Napoli	40.855	14.26	1885	-10.44
Napoli	40.855	14.26	1885		56.87
Napoli	40.855	14.26	1886	-10.35
Napoli	40.855	14.26	1886		56.86
Napoli	40.855	14.26	1887	-10.27	56.88
Napoli	40.855	14.26	1888	-10.24	56.85
Napoli	40.855	14.26	1889	-10.12
Napoli	40.855	14.26	1889		56.82
Napoli	40.855	14.26	1890	-10.04
Napoli	40.855	14.26	1890		56.78
Napoli	40.855	14.26	1891	-9.94
Napoli	40.855	14.26	1891		56.77
Napoli	40.855	14.26	1892	-9.87
Napoli	40.855	14.26	1892		56.77
Napoli	40.855	14.26	1893	-9.83
Napoli	40.855	14.26	1893		56.7
Napoli	40.855	14.26	1895	-9.45
Napoli	40.855	14.26	1895		56.63
Napoli	40.855	14.26	1896	-9.54
Napoli	40.855	14.26	1896		56.62
Napoli	40.855	14.26	1897	-9.44
Napoli	40.855	14.26	1897		56.52
Napoli	40.855	14.26	1898	-9.38
Napoli	40.855	14.26	1898		56.48
Napoli	40.855	14.26	1899	-9.26
Napoli	40.855	14.26	1899		56.42
Napoli	40.855	14.26	1900	-9.17
Napoli	40.855	14.26	1900		56.4
Napoli	40.855	14.26	1901	-9.09
Napoli	40.855	14.26	1901		56.34
Napoli	40.855	14.26	1902	-9.03
Napoli	40.855	14.26	1902		56.29
Napoli	40.855	14.26	1903	-8.94
Napoli	40.855	14.26	1903		56.3
Napoli	40.855	14.26	1904	-8.84
Napoli	40.855	14.26	1904		56.26
Napoli	40.855	14.26	1905	-8.76
Napoli	40.855	14.26	1905		56.25
Napoli	40.855	14.26	1906	-8.67	56.23
Napoli	40.855	14.26	1907	-8.58	56.22
Napoli	40.855	14.26	1908	-8.47	56.22
Napoli	40.855	14.26	1909	-8.36	56.24
Napoli	40.855	14.26	1910	-8.22	56.2
Napoli	40.855	14.26	1911	-8.09	56.2
Napoli	40.855	14.26	1912		56.21
Napoli	40.855	14.26	1913		56.17
Napoli	40.855	14.26	1914		56.2
Napoli	40.855	14.26	1915		56.21
Napoli	40.855	14.26	1916		56.21
Napoli	40.855	14.26	1917		56.25
Napoli	40.855	14.26	1918		56.24
Napoli	40.855	14.26	1919		56.3
Napoli	40.855	14.26	1920		56.41
Napoli	40.855	14.26	1921		56.2
Napoli	40.855	14.26	1922	-6.43
Padova	45.406	11.875	1600	5
Padova	45.406	11.875	1670	-5
Padova	45.406	11.875	1679	-5
Padova	45.406	11.875	1728	-13
Padova	45.406	11.875	1770	-16.3
Padova	45.406	11.875	1796	-18.3
Padova	45.406	11.875	1806	-17.7
Padova	45.406	11.875	1807	-17.55
Padova	45.406	11.875	1808	-17.85
Padova	45.406	11.875	1809	-18.57
Padova	45.406	11.875	1810	-17.58
Padova	45.406	11.875	1811	-18
Padova	45.406	11.875	1812	-18.27
Padova	45.406	11.875	1813	-18.25
Padova	45.406	11.875	1847	-15.52	62.97
Padova	45.406	11.875	1848	-15.59	62.96
Padova	45.406	11.875	1850	-15.18	62.87
Padova	45.406	11.875	1854	-14.9
Padova	45.406	11.875	1859	-14.18
Padova	45.406	11.875	1871	-12.8	61.85
Padova	45.406	11.875	1881	-11.88	61.81
Padova	45.406	11.875	1881	-11.85	61.75
Padova	45.406	11.875	1882	-11.85	61.69
Padova	45.406	11.875	1884	-11.52	61.68
Padova	45.406	11.875	1887	-11.15	61.62
Palermo	38.12	13.352	1640	6
Palermo	38.12	13.352	1814	-18.5
Palermo	38.12	13.352	1815	-18.75
Palermo	38.12	13.352	1836	-16.05	57.26
Palermo	38.12	13.352	1871	-12.28	54.5
Palermo	38.12	13.352	1875	-11.26	54.3
Palermo	38.12	13.352	1882	-10.73	54.13
Palermo	38.12	13.352	1890	-10.24	54
Palermo	38.12	13.352	1890	-10.21	53.98
Palermo	38.12	13.352	1892	-10.08	53.95
Palermo	38.12	13.352	1924	-6.37	53.23
Pola	44.867	13.85	1881	-10.9683
Pola	44.867	13.85	1882	-10.885
Pola	44.867	13.85	1883	-10.7933
Pola	44.867	13.85	1884	-10.72
Pola	44.867	13.85	1885	-10.6417
Pola	44.867	13.85	1886	-10.5667
Pola	44.867	13.85	1887	-10.4883
Pola	44.867	13.85	1888	-10.4217
Pola	44.867	13.85	1889	-10.3417
Pola	44.867	13.85	1890	-10.2533
Pola	44.867	13.85	1891	-10.1767
Pola	44.867	13.85	1892	-10.0733
Pola	44.867	13.85	1893	-9.97
Pola	44.867	13.85	1894	-9.89
Pola	44.867	13.85	1895	-9.81167
Pola	44.867	13.85	1896	-9.74167
Pola	44.867	13.85	1897	-9.675
Pola	44.867	13.85	1898	-9.59833
Pola	44.867	13.85	1899	-9.52833
Pola	44.867	13.85	1900	-9.44667
Pola	44.867	13.85	1901	-9.365
Pola	44.867	13.85	1902	-9.27
Pola	44.867	13.85	1903	-9.17667
Pola	44.867	13.85	1904	-9.08833
Pola	44.867	13.85	1905	-8.98
Pola	44.867	13.85	1906	-8.925
Pola	44.867	13.85	1907	-8.78
Pola	44.867	13.85	1908	-8.67667
Pola	44.867	13.85	1909	-8.56
Pola	44.867	13.85	1910	-8.42167
Pola	44.867	13.85	1911	-8.24667
Pola	44.867	13.85	1912	-8.09667
Pola	44.867	13.85	1913	-7.92333
Pola	44.867	13.85	1914	-7.76
Pola	44.867	13.85	1915	-7.605
Pola	44.867	13.85	1916	-7.275
Pola	44.867	13.85	1917	-7.275
Pola	44.867	13.85	1918	-7.13833
Pola	44.867	13.85	1919	-6.98167
Pola	44.867	13.85	1921	-6.59833
Pola	44.867	13.85	1922	-6.42167
Roma	41.9	12.45	1436	5
Roma	41.9	12.45	1510	6
Roma	41.9	12.45	1600	11
Roma	41.9	12.45	1640	3
Roma	41.9	12.45	1640	3
Roma	41.9	12.45	1640	3
Roma	41.9	12.45	1640	2
Roma	41.9	12.45	1640	3
Roma	41.9	12.45	1640	2	66
Roma	41.9	12.45	1670	-2
Roma	41.9	12.45	1680	-5
Roma	41.9	12.45	1681	-5
Roma	41.9	12.45	1695	-8
Roma	41.9	12.45	1702	-10
Roma	41.9	12.45	1730	-11
Roma	41.9	12.45	1742	-15.7
Roma	41.9	12.45	1762	-16
Roma	41.9	12.45	1782	-16.8
Roma	41.9	12.45	1783	-16.8
Roma	41.9	12.45	1784	-16.9
Roma	41.9	12.45	1785	-17
Roma	41.9	12.45	1786	-17.1
Roma	41.9	12.45	1787	-17.1
Roma	41.9	12.45	1788	-16.2
Roma	41.9	12.45	1802	-17.2
Roma	41.9	12.45	1806		61.95
Roma	41.9	12.45	1806	-17.28
Roma	41.9	12.45	1807	-17.14
Roma	41.9	12.45	1808	-16.97
Roma	41.9	12.45	1811	-17.05
Roma	41.9	12.45	1812	-16.92
Roma	41.9	12.45	1833	-16.25	61.63
Roma	41.9	12.45	1833	-16.32
Roma	41.9	12.45	1834	-16.58
Roma	41.9	12.45	1838		60.24
Roma	41.9	12.45	1840		60.2
Roma	41.9	12.45	1840		60.12
Roma	41.9	12.45	1850	-14.52
Roma	41.9	12.45	1853	-14.06
Roma	41.9	12.45	1859	-13.83
Roma	41.9	12.45	1859		59.23
Roma	41.9	12.45	1859		59.17
Roma	41.9	12.45	1859		59.28
Roma	41.9	12.45	1860	-13.73
Roma	41.9	12.45	1860	-13.72	59.11
Roma	41.9	12.45	1861	-13.91	59.27
Roma	41.9	12.45	1870	-13.18	58.85
Roma	41.9	12.45	1870	-13.28	58.83
Roma	41.9	12.45	1870	-13.24
Roma	41.9	12.45	1870	-13.23	58.79
Roma	41.9	12.45	1871	-13.13	58.84
Roma	41.9	12.45	1871	-13.07	58.82
Roma	41.9	12.45	1872	-12.94	58.71
Roma	41.9	12.45	1873	-12.93
Roma	41.9	12.45	1875	-12.54
Roma	41.9	12.45	1875	-12.28	58.85
Roma	41.9	12.45	1876	-12.65
Roma	41.9	12.45	1876	-12.58
Roma	41.9	12.45	1876	-12.42	58.75
Roma	41.9	12.45	1877	-11.98
Roma	41.9	12.45	1877	-11.89
Roma	41.9	12.45	1878	-11.38
Roma	41.9	12.45	1878	-11.83
Roma	41.9	12.45	1878	-12.19	58.58
Roma	41.9	12.45	1879	-11.84
Roma	41.9	12.45	1879	-12.24
Roma	41.9	12.45	1879	-12.07
Roma	41.9	12.45	1884	-11.12	58.31
Roma	41.9	12.45	1885	-11	58.12
Roma	41.9	12.45	1886	-11.18	58.24
Roma	41.9	12.45	1887	-10.97
Roma	41.9	12.45	1887	-11.03
Roma	41.9	12.45	1887	-11.19	58.38
Roma	41.9	12.45	1888	-11.04	58.19
Roma	41.9	12.45	1888	-11.03	58.2
Roma	41.9	12.45	1889	-10.93	58.2
Roma	41.9	12.45	1890	-10.87	58.15
Roma	41.9	12.45	1890	-10.87	58.17
Roma	41.9	12.45	1890	-10.87	58.15
Roma	41.9	12.45	1891	-10.81
Roma	41.9	12.45	1891	-10.78	58.14
Roma	41.9	12.45	1891	-10.76	58.07
Roma	41.9	12.45	1892	-10.68	58.15
Roma	41.9	12.45	1922	-7	57.61
Roma	41.9	12.45	1923	-7	57.6
Subiaco	41.92	13.09	1860	-14.5
Subiaco	41.92	13.09	1860	-14
Subiaco	41.92	13.09	1860	-13.83
Subiaco	41.92	13.09	1861	-13.67
Subiaco	41.92	13.09	1862	-13.67
Subiaco	41.92	13.09	1863	-13.5
Subiaco	41.92	13.09	1864	-13.5
Subiaco	41.92	13.09	1865	-13.42
Subiaco	41.92	13.09	1865	-13.38
Subiaco	41.92	13.09	1865	-13.33
Subiaco	41.92	13.09	1866	-13
Subiaco	41.92	13.09	1867	-12.67
Subiaco	41.92	13.09	1868	-12.67
Subiaco	41.92	13.09	1869	-12.5
Subiaco	41.92	13.09	1872	-12.33	58.73
Subiaco	41.92	13.09	1889	-10.73	58.17
Torino	45.4	7.73	1805		63.05
Torino	45.4	7.73	1838		63.87
Torino	45.4	7.73	1840		63.93
Torino	45.4	7.73	1841	-18.05
Torino	45.4	7.73	1843		63.94
Torino	45.4	7.73	1843		64.19
Torino	45.4	7.73	1858		62.97
Torino	45.4	7.73	1860		62.42
Torino	45.4	7.73	1862		62.47
Torino	45.4	7.73	1867		62.46
Torino	45.4	7.73	1868		62.45
Torino	45.4	7.73	1871		62.98
Torino	45.4	7.73	1873		62.85
Torino	45.4	7.73	1873		62.65
Torino	45.4	7.73	1875		62.9
Torino	45.4	7.73	1876	-13.76	62.93
Torino	45.4	7.73	1876		62.87
Torino	45.4	7.73	1877		62.83
Torino	45.4	7.73	1878		62.84
Torino	45.4	7.73	1879		62.76
Torino	45.4	7.73	1880		62.73
Torino	45.4	7.73	1881		62.72
Torino	45.4	7.73	1882		62.69
Torino	45.4	7.73	1882		62.72
Torino	45.4	7.73	1884		62.75
Torino	45.4	7.73	1887		62.69
Torino	45.4	7.73	1889		62.66
Trieste	45.656	13.784	1812	-17.73
Trieste	45.656	13.784	1826		64.43
Trieste	45.656	13.784	1838		63.34
Trieste	45.656	13.784	1848	-14.78	62.75
Trieste	45.656	13.784	1854	-14.05	62.6
Trieste	45.656	13.784	1857	-13.87	62.32
Trieste	45.656	13.784	1867		61.95
Trieste	45.656	13.784	1868	-12.53	61.82
Trieste	45.656	13.784	1870	-12.31
Trieste	45.656	13.784	1873	-11.98
Trieste	45.656	13.784	1890	-10.46	61.37
Trieste	45.656	13.784	1921	-6.85	60.99
Venezia	45.437	12.335	1640	5
Venezia	45.437	12.335	1783	-17
Venezia	45.437	12.335	1815	-18.08
Venezia	45.437	12.335	1825	-17.87
Venezia	45.437	12.335	1838		63.37
Venezia	45.437	12.335	1840		63.11
Venezia	45.437	12.335	1848	-15.47	62.93
Venezia	45.437	12.335	1854	-14.57	62.56
Venezia	45.437	12.335	1868		62.35
Venezia	45.437	12.335	1873	-12.57
Venezia	45.437	12.335	1884	-11.47	61.52
Venezia	45.437	12.335	1887	-11.03	61.4
Venezia	45.437	12.335	1889	-11.05	61.44
Venezia	45.437	12.335	1890	-11	61.41
Venezia	45.437	12.335	1905	-9.71	60.92
Venezia	45.437	12.335	1921	-7.33	61.04
