# Supplementary material for: A re-evaluation of the Italian historical geomagnetic catalogue: implications for paleomagnetic dating at active Italian volcanoes
Source: Copernicus journal article supplement (doi:10.5194/se-2-65-2011), 2011-06-09
Supplement: Supplementary file 3 [file varsec-DatabaseS2.xls]

## Sheet: Foglio1
site	lat	long	year	reloc. dec.	reloc. inc.
Ancona	43.603	13.507	1812	-16.363	59.2358
Ancona	43.603	13.507	1818	-16.8335	58.0982
Ancona	43.603	13.507	1855	-12.6648	56.3925
Ancona	43.603	13.507	1873	-10.6509	55.12
Ancona	43.603	13.507	1882	-10.175	55.1792
Ancona	43.603	13.507	1888	-9.70745	55.1375
Ancona	43.603	13.507	1890	-9.51006	55.0378
Ancona	43.603	13.507	1921	-6.07795	54.5113
Bologna	44.497	11.339	1640	2.07188	63.6839
Bologna	44.497	11.339	1657	-1.50024	63.5294
Bologna	44.497	11.339	1696	-6.84239	63.3345
Bologna	44.497	11.339	1733	-13.2226	65.461
Bologna	44.497	11.339	1733	-13.2226	65.461
Bologna	44.497	11.339	1750	-15.6467	63.5018
Bologna	44.497	11.339	1750	-15.6467	63.5018
Bologna	44.497	11.339	1783	-15.9721	62.9512
Bologna	44.497	11.339	1783	-15.9721	62.9512
Bologna	44.497	11.339	1784	-16.3255	62.9212
Bologna	44.497	11.339	1784	-16.3255	62.9212
Bologna	44.497	11.339	1787	-16.5405	61.7996
Bologna	44.497	11.339	1787	-16.5405	61.7996
Bologna	44.497	11.339	1788	-16.7161	61.7342
Bologna	44.497	11.339	1788	-16.7161	61.7342
Bologna	44.497	11.339	1789	-16.6304	59.6009
Bologna	44.497	11.339	1789	-16.6304	59.6009
Bologna	44.497	11.339	1790	-16.6304	59.6009
Bologna	44.497	11.339	1791	-16.7205	59.5994
Bologna	44.497	11.339	1792	-16.8105	59.5979
Bologna	44.497	11.339	1805	-16.3694	59.6054
Bologna	44.497	11.339	1812	-17.6655	59.5843
Bologna	44.497	11.339	1856	-13.8385	55.9402
Bologna	44.497	11.339	1857	-13.5097	55.9482
Bologna	44.497	11.339	1859	-13.528	55.9478
Bologna	44.497	11.339	1868	-12.539	55.7074
Bologna	44.497	11.339	1890	-10.2436	55.0465
Brindisi	40.632	17.945	1823	-14.4059	56.4237
Brindisi	40.632	17.945	1855	-11.7593	55.8474
Brindisi	40.632	17.945	1870	-10.0101	56.2722
Brindisi	40.632	17.945	1873	-9.86653	55.3333
Brindisi	40.632	17.945	1886	-9.04041	54.7282
Brindisi	40.632	17.945	1890	-8.66207	54.65
Brindisi	40.632	17.945	1922	-5.05686	54.2001
Castellaccio	44.429	8.933	1933	-6.17036	54.6906
Castellaccio	44.429	8.933	1934	-6.02391	54.7013
Castellaccio	44.429	8.933	1935	-5.8744	54.7123
Castellaccio	44.429	8.933	1936	-5.73556	54.7225
Castellaccio	44.429	8.933	1937	-5.59823	54.7327
Castellaccio	44.429	8.933	1938	-5.47462	54.7418
Castellaccio	44.429	8.933	1939	-5.33117	54.7525
Castellaccio	44.429	8.933	1940	-5.20296	54.7621
Castellaccio	44.429	8.933	1941	-5.061	54.7727
Castellaccio	44.429	8.933	1942	-4.95566	54.7806
Castellaccio	44.429	8.933	1943	-4.84269	54.7891
Castellaccio	44.429	8.933	1944	-4.71291	54.7989
Castellaccio	44.429	8.933	1945	-4.60144	54.8074
Castellaccio	44.429	8.933	1946	-4.47622	54.8169
Castellaccio	44.429	8.933	1947	-4.34752	54.8498
Castellaccio	44.429	8.933	1948	-4.21771	54.8597
Castellaccio	44.429	8.933	1949	-4.10162	54.8686
Castellaccio	44.429	8.933	1950	-3.99164	54.8771
Castellaccio	44.429	8.933	1951	-3.87249	54.8863
Castellaccio	44.429	8.933	1952	-3.75332	54.8955
Castellaccio	44.429	8.933	1953	-3.65095	54.9034
Castellaccio	44.429	8.933	1954	-3.55469	54.9109
Castellaccio	44.429	8.933	1955	-3.45689	54.9185
Castellaccio	44.429	8.933	1956	-3.35602	54.9263
Castellaccio	44.429	8.933	1957	-3.25974	54.9339
Castellaccio	44.429	8.933	1958	-3.17873	54.9402
Castellaccio	44.429	8.933	1959	-3.09772	54.9466
Castellaccio	44.429	8.933	1960	-3.02282	54.9525
Castellaccio	44.429	8.933	1961	-2.95056	54.9547
Castellaccio	44.429	8.933	1962	-2.87499	54.9295
Catania	37.5	15.087	1640	6.11803	63.6599
Catania	37.5	15.087	1829	-16.7456	57.1071
Catania	37.5	15.087	1839	-14.8371	56.451
Catania	37.5	15.087	1841	-15.5381	56.446
Catania	37.5	15.087	1842	-15.3247	56.4476
Catania	37.5	15.087	1843	-15.2536	56.4481
Catania	37.5	15.087	1843	-15.8413	55.4734
Catania	37.5	15.087	1882	-11.5156	55.541
Catania	37.5	15.087	1882	-11.4739	55.4249
Catania	37.5	15.087	1882	-11.6588	55.6468
Catania	37.5	15.087	1891	-9.79373	53.6126
Catania	37.5	15.087	1896	-10.5877	56.2831
Firenze	43.777	11.248	1640	2.09912	63.6834
Firenze	43.777	11.248	1806	-16.4907	59.2264
Firenze	43.777	11.248	1809	-16.3538	59.2295
Firenze	43.777	11.248	1826	-15.2922	58.0991
Firenze	43.777	11.248	1831	-15.2625	57.4755
Firenze	43.777	11.248	1832	-15.2944	58.1444
Firenze	43.777	11.248	1835	-15.3201	58.6651
Firenze	43.777	11.248	1838	-15.2609	57.4415
Firenze	43.777	11.248	1838	-15.2472	57.1464
Firenze	43.777	11.248	1840	-15.2529	57.2713
Firenze	43.777	11.248	1844	-15.0378	56.1846
Firenze	43.777	11.248	1845	-14.7336	56.1927
Firenze	43.777	11.248	1846	-14.7613	56.1919
Firenze	43.777	11.248	1846	-14.6414	56.1952
Firenze	43.777	11.248	1847	-14.6691	56.1944
Firenze	43.777	11.248	1848	-14.5031	56.1989
Firenze	43.777	11.248	1850	-14.3463	56.2033
Firenze	43.777	11.248	1851	-14.3066	56.341
Firenze	43.777	11.248	1851	-13.984	56.35
Firenze	43.777	11.248	1852	-13.9379	56.3513
Firenze	43.777	11.248	1853	-13.8272	56.3544
Firenze	43.777	11.248	1854	-13.8918	56.3526
Firenze	43.777	11.248	1856	-13.6152	56.3605
Firenze	43.777	11.248	1857	-13.4292	55.9561
Firenze	43.777	11.248	1859	-13.3369	55.9589
Firenze	43.777	11.248	1859	-13.3369	55.9589
Firenze	43.777	11.248	1868	-12.5413	55.5845
Firenze	43.777	11.248	1871	-12.5183	55.118
Firenze	43.777	11.248	1871	-12.5183	55.118
Firenze	43.777	11.248	1875	-12.1839	55.1059
Firenze	43.777	11.248	1885	-10.6875	55.0536
Firenze	43.777	11.248	1887	-10.5392	55.0588
Genova	44.419	8.897	1640	4.37757	63.8726
Genova	44.419	8.897	1651	4.37757	63.8726
Genova	44.419	8.897	1698	-9.85208	67.4653
Genova	44.419	8.897	1698	-9.85208	67.4653
Genova	44.419	8.897	1805	-15.9822	59.0395
Genova	44.419	8.897	1817	-18.8715	57.9308
Genova	44.419	8.897	1840	-16.4356	56.957
Genova	44.419	8.897	1846	-15.8509	56.1681
Genova	44.419	8.897	1886	-12.0145	54.8514
Genova	44.419	8.897	1887	-11.9009	54.8116
Genova	44.419	8.897	1892	-11.4974	54.708
Genova	44.419	8.897	1924	-7.75268	54.2926
L'Aquila	42.383	13.317	1960	-1.34921	55.0856
L'Aquila	42.383	13.317	1961	-1.30159	55.0868
L'Aquila	42.383	13.317	1962	-1.2246	55.0668
L'Aquila	42.383	13.317	1963	-1.15793	55.0684
L'Aquila	42.383	13.317	1964	-1.09085	55.0591
L'Aquila	42.383	13.317	1965	-1.04242	55.0384
L'Aquila	42.383	13.317	1966	-0.985264	55.0398
L'Aquila	42.383	13.317	1967	-0.937636	55.041
L'Aquila	42.383	13.317	1968	-0.890006	55.0421
L'Aquila	42.383	13.317	1969	-0.841156	55.0106
L'Aquila	42.383	13.317	1970	-0.793116	55.0008
L'Aquila	42.383	13.317	1971	-0.725203	54.9698
L'Aquila	42.383	13.317	1972	-0.677157	54.96
L'Aquila	42.383	13.317	1973	-0.610051	54.9508
L'Aquila	42.383	13.317	1974	-0.533824	54.9527
L'Aquila	42.383	13.317	1975	-0.457183	54.9437
L'Aquila	42.383	13.317	1976	-0.370595	54.924
L'Aquila	42.383	13.317	1977	-0.2753	54.9264
L'Aquila	42.383	13.317	1978	-0.180835	54.9506
L'Aquila	42.383	13.317	1979	-0.0847006	54.9312
L'Aquila	42.383	13.317	1980	-0.0106026	54.9336
L'Aquila	42.383	13.317	1981	-0.105063	54.9578
L'Aquila	42.383	13.317	1982	0.209048	54.9822
L'Aquila	42.383	13.317	1983	0.294821	54.9844
L'Aquila	42.383	13.317	1984	0.399229	54.998
L'Aquila	42.383	13.317	1985	0.484143	55.022
L'Aquila	42.383	13.317	1986	0.559955	55.0349
L'Aquila	42.383	13.317	1987	0.635765	55.0477
L'Aquila	42.383	13.317	1988	0.72023	55.0826
L'Aquila	42.383	13.317	1989	0.776097	55.1168
L'Aquila	42.383	13.317	1990	0.841925	55.1403
L'Aquila	42.383	13.317	1991	0.907307	55.1747
L'Aquila	42.383	13.317	1992	0.964483	55.1762
L'Aquila	42.383	13.317	1993	1.03163	55.1671
L'Aquila	42.383	13.317	1994	1.12649	55.1805
L'Aquila	42.383	13.317	1995	1.20272	55.1825
L'Aquila	42.383	13.317	1996	1.2885	55.1848
L'Aquila	42.383	13.317	1997	1.3829	55.2091
L'Aquila	42.383	13.317	1998	1.47684	55.2443
L'Aquila	42.383	13.317	1999	1.55216	55.2681
L'Aquila	42.383	13.317	2000	1.61841	55.2808
L'Aquila	42.383	13.317	2001	1.69465	55.2828
L'Aquila	42.383	13.317	2002	1.76997	55.3066
L'Aquila	42.383	13.317	2003	1.86434	55.331
L'Aquila	42.383	13.317	2004	1.95011	55.3333
L'Aquila	42.383	13.317	2005	2.01636	55.346
L'Aquila	42.383	13.317	2006	2.09306	55.3372
L'Aquila	42.383	13.317	2007	2.24389	55.3798
L'Aquila	42.383	13.317	2008	2.31987	55.3879
L'Aquila	42.383	13.317	2009	2.40522	55.4
L'Aquila	42.383	13.317	2010	2.48082	55.4167
Messina	38.2	15.549	1640	0.055998	63.6601
Messina	38.2	15.549	1815	-18.7104	59.7125
Messina	38.2	15.549	1829	-17.3542	57.1013
Messina	38.2	15.549	1834	-15.8016	56.784
Messina	38.2	15.549	1841	-15.5303	56.4488
Messina	38.2	15.549	1848	-8.79592	56.0883
Messina	38.2	15.549	1882	-10.4863	54.5279
Messina	38.2	15.549	1891	-9.50943	54.3873
Messina	38.2	15.549	1892	-9.37861	54.3476
Messina	38.2	15.549	1924	-5.66395	53.7049
Milano	45.464	9.189	1630	5.18463	59.6709
Milano	45.464	9.189	1640	1.67925	63.6764
Milano	45.464	9.189	1805	-15.9903	59.3973
Milano	45.464	9.189	1825	-16.7489	58.0437
Milano	45.464	9.189	1831	-17.8719	57.6465
Milano	45.464	9.189	1831	-17.8719	57.6465
Milano	45.464	9.189	1832	-17.8798	57.765
Milano	45.464	9.189	1835	-16.673	57.3579
Milano	45.464	9.189	1836	-16.673	57.3579
Milano	45.464	9.189	1836	-16.6996	57.3569
Milano	45.464	9.189	1836	-16.7173	57.3562
Milano	45.464	9.189	1836	-16.7085	57.3566
Milano	45.464	9.189	1836	-16.7173	57.3562
Milano	45.464	9.189	1836	-16.3986	57.3686
Milano	45.464	9.189	1837	-16.5395	57.1015
Milano	45.464	9.189	1837	-16.5307	57.1018
Milano	45.464	9.189	1837	-16.5243	57.1378
Milano	45.464	9.189	1837	-16.4905	57.1629
Milano	45.464	9.189	1837	-16.4986	57.1507
Milano	45.464	9.189	1837	-16.4808	57.1514
Milano	45.464	9.189	1837	-16.4969	57.1269
Milano	45.464	9.189	1837	-16.4961	57.1151
Milano	45.464	9.189	1838	-16.5036	57.2218
Milano	45.464	9.189	1838	-16.518	57.1737
Milano	45.464	9.189	1838	-16.5074	57.1503
Milano	45.464	9.189	1838	-16.5103	57.3167
Milano	45.464	9.189	1838	-16.5112	57.3285
Milano	45.464	9.189	1838	-16.5508	57.3864
Milano	45.464	9.189	1838	-16.5517	57.3983
Milano	45.464	9.189	1838	-16.5192	57.3163
Milano	45.464	9.189	1838	-16.2252	57.3041
Milano	45.464	9.189	1838	-16.2252	57.3041
Milano	45.464	9.189	1838	-16.5352	57.2919
Milano	45.464	9.189	1839	-16.4766	57.3418
Milano	45.464	9.189	1839	-16.4576	57.1998
Milano	45.464	9.189	1839	-16.4416	57.2242
Milano	45.464	9.189	1843	-15.5724	57.1285
Milano	45.464	9.189	1847	-15.0861	56.5781
Milano	45.464	9.189	1847	-15.7846	56.62
Milano	45.464	9.189	1859	-14.1178	57.1912
Milano	45.464	9.189	1864	-13.7285	57.0071
Milano	45.464	9.189	1868	-11.2728	55.7979
Milano	45.464	9.189	1884	-11.4404	55.3367
Napoli	40.855	14.26	1640	0.150123	63.638
Napoli	40.855	14.26	1829	-14.8548	56.4414
Napoli	40.855	14.26	1836	-14.8569	56.873
Napoli	40.855	14.26	1838	-14.8579	57.0941
Napoli	40.855	14.26	1840	-15.226	56.9773
Napoli	40.855	14.26	1840	-15.226	56.9668
Napoli	40.855	14.26	1841	-15.0798	56.8198
Napoli	40.855	14.26	1842	-14.991	56.4937
Napoli	40.855	14.26	1843	-14.759	56.6944
Napoli	40.855	14.26	1843	-14.7585	56.5996
Napoli	40.855	14.26	1844	-14.2634	56.58
Napoli	40.855	14.26	1844	-14.2634	56.58
Napoli	40.855	14.26	1845	-14.2052	56.5802
Napoli	40.855	14.26	1846	-13.982	56.5809
Napoli	40.855	14.26	1847	-13.749	56.5817
Napoli	40.855	14.26	1859	-13.0859	56.1104
Napoli	40.855	14.26	1860	-12.9767	55.7633
Napoli	40.855	14.26	1864	-12.3527	55.4499
Napoli	40.855	14.26	1869	-10.1213	56.8616
Napoli	40.855	14.26	1871	-10.9422	55.3094
Napoli	40.855	14.26	1871	-11.2241	55.3079
Napoli	40.855	14.26	1871	-11.6129	55.3059
Napoli	40.855	14.26	1874	-12.3526	55.4394
Napoli	40.855	14.26	1875	-11.1431	54.9185
Napoli	40.855	14.26	1879	-10.6019	55.3113
Napoli	40.855	14.26	1881	-10.4428	54.9119
Napoli	40.855	14.26	1882	-10.4428	54.9119
Napoli	40.855	14.26	1883	-10.2769	54.8496
Napoli	40.855	14.26	1884	-10.1694	54.7976
Napoli	40.855	14.26	1884	-10.1694	54.7976
Napoli	40.855	14.26	1885	-10.0914	54.777
Napoli	40.855	14.26	1885	-10.0914	54.777
Napoli	40.855	14.26	1886	-10.0038	54.767
Napoli	40.855	14.26	1886	-10.0038	54.767
Napoli	40.855	14.26	1887	-9.92618	54.7885
Napoli	40.855	14.26	1888	-9.8967	54.7571
Napoli	40.855	14.26	1889	-9.77967	54.7262
Napoli	40.855	14.26	1889	-9.77967	54.7262
Napoli	40.855	14.26	1890	-9.70145	54.6846
Napoli	40.855	14.26	1890	-9.70145	54.6846
Napoli	40.855	14.26	1891	-9.60407	54.6746
Napoli	40.855	14.26	1891	-9.60407	54.6746
Napoli	40.855	14.26	1892	-9.53597	54.6751
Napoli	40.855	14.26	1892	-9.53597	54.6751
Napoli	40.855	14.26	1893	-9.49634	54.6016
Napoli	40.855	14.26	1893	-9.49634	54.6016
Napoli	40.855	14.26	1895	-9.12589	54.5303
Napoli	40.855	14.26	1895	-9.12589	54.5303
Napoli	40.855	14.26	1896	-9.21336	54.5192
Napoli	40.855	14.26	1896	-9.21336	54.5192
Napoli	40.855	14.26	1897	-9.11501	54.4144
Napoli	40.855	14.26	1897	-9.11501	54.4144
Napoli	40.855	14.26	1898	-9.0562	54.3727
Napoli	40.855	14.26	1898	-9.0562	54.3727
Napoli	40.855	14.26	1899	-8.93878	54.3103
Napoli	40.855	14.26	1899	-8.93878	54.3103
Napoli	40.855	14.26	1900	-8.85097	54.2898
Napoli	40.855	14.26	1900	-8.85097	54.2898
Napoli	40.855	14.26	1901	-8.77247	54.2271
Napoli	40.855	14.26	1901	-8.77247	54.2271
Napoli	40.855	14.26	1902	-8.71353	54.1748
Napoli	40.855	14.26	1902	-8.71353	54.1748
Napoli	40.855	14.26	1903	-8.62603	54.186
Napoli	40.855	14.26	1903	-8.62603	54.186
Napoli	40.855	14.26	1904	-8.52825	54.1445
Napoli	40.855	14.26	1904	-8.52825	54.1445
Napoli	40.855	14.26	1905	-8.45027	54.1346
Napoli	40.855	14.26	1905	-8.45027	54.1346
Napoli	40.855	14.26	1906	-8.36244	54.1141
Napoli	40.855	14.26	1907	-8.27471	54.1042
Napoli	40.855	14.26	1908	-8.16763	54.105
Napoli	40.855	14.26	1909	-8.06077	54.1269
Napoli	40.855	14.26	1910	-7.92402	54.0858
Napoli	40.855	14.26	1911	-7.79746	54.0868
Napoli	40.855	14.26	1912	-7.94361	54.0962
Napoli	40.855	14.26	1913	-7.94315	54.054
Napoli	40.855	14.26	1914	-7.62222	54.0881
Napoli	40.855	14.26	1915	-7.62234	54.0987
Napoli	40.855	14.26	1916	-7.62234	54.0987
Napoli	40.855	14.26	1917	-7.62282	54.1408
Napoli	40.855	14.26	1918	-6.00654	54.1439
Napoli	40.855	14.26	1919	-6.00735	54.2071
Napoli	40.855	14.26	1920	-6.00885	54.3229
Napoli	40.855	14.26	1921	-6.006	54.1017
Napoli	40.855	14.26	1922	-6.18502	54.3951
Padova	45.406	11.875	1670	-5.35	67.7954
Padova	45.406	11.875	1670	-5.35	67.7954
Padova	45.406	11.875	1679	-5.35	67.7954
Padova	45.406	11.875	1679	-5.35	67.7954
Padova	45.406	11.875	1728	-11.9881	65.5366
Padova	45.406	11.875	1728	-11.9881	65.5366
Padova	45.406	11.875	1770	-14.7294	62.4127
Padova	45.406	11.875	1770	-14.7294	62.4127
Padova	45.406	11.875	1796	-16.4597	61.12
Padova	45.406	11.875	1806	-15.8989	59.2341
Padova	45.406	11.875	1807	-15.7655	59.2352
Padova	45.406	11.875	1808	-16.0323	59.2332
Padova	45.406	11.875	1809	-16.6728	59.229
Padova	45.406	11.875	1810	-15.7921	59.235
Padova	45.406	11.875	1811	-16.1657	59.2322
Padova	45.406	11.875	1812	-16.4059	59.2306
Padova	45.406	11.875	1813	-16.3881	59.2307
Padova	45.406	11.875	1847	-13.903	56.8241
Padova	45.406	11.875	1848	-13.9657	56.8116
Padova	45.406	11.875	1850	-13.5946	56.7108
Padova	45.406	11.875	1854	-13.3353	56.3975
Padova	45.406	11.875	1859	-12.6757	55.9727
Padova	45.406	11.875	1871	-11.4173	55.5474
Padova	45.406	11.875	1881	-10.5842	55.5166
Padova	45.406	11.875	1881	-10.5548	55.4466
Padova	45.406	11.875	1882	-10.5525	55.3761
Padova	45.406	11.875	1884	-10.2536	55.3706
Padova	45.406	11.875	1887	-9.91641	55.3073
Palermo	38.12	13.352	1640	5.78112	63.7404
Palermo	38.12	13.352	1836	-16.134	57.4961
Palermo	38.12	13.352	1871	-12.2303	54.8578
Palermo	38.12	13.352	1875	-11.1981	54.6875
Palermo	38.12	13.352	1882	-10.6591	54.5336
Palermo	38.12	13.352	1890	-10.1618	54.4183
Palermo	38.12	13.352	1890	-10.1309	54.3994
Palermo	38.12	13.352	1892	-9.99912	54.3732
Palermo	38.12	13.352	1924	-6.24284	53.7628
Pola	44.867	13.85	1881	-9.97556	55.2188
Pola	44.867	13.85	1882	-9.89913	55.2186
Pola	44.867	13.85	1883	-9.81506	55.2185
Pola	44.867	13.85	1884	-9.7478	55.2184
Pola	44.867	13.85	1885	-9.67627	55.0796
Pola	44.867	13.85	1886	-9.60745	55.0795
Pola	44.867	13.85	1887	-9.53558	55.0795
Pola	44.867	13.85	1888	-9.47434	55.1256
Pola	44.867	13.85	1889	-9.40095	55.1255
Pola	44.867	13.85	1890	-9.31995	55.0908
Pola	44.867	13.85	1891	-9.24961	55.0908
Pola	44.867	13.85	1892	-9.1548	55.0907
Pola	44.867	13.85	1893	-9.05999	55.0907
Pola	44.867	13.85	1894	-8.98659	55.0907
Pola	44.867	13.85	1895	-8.91472	55.0907
Pola	44.867	13.85	1896	-8.8505	55.0907
Pola	44.867	13.85	1897	-8.78933	55.0907
Pola	44.867	13.85	1898	-8.71899	55.0908
Pola	44.867	13.85	1899	-8.65423	54.5358
Pola	44.867	13.85	1900	-8.57918	54.5359
Pola	44.867	13.85	1901	-8.50412	54.536
Pola	44.867	13.85	1902	-8.41681	54.536
Pola	44.867	13.85	1903	-8.33103	54.5361
Pola	44.867	13.85	1904	-8.24985	54.5363
Pola	44.867	13.85	1905	-8.15028	54.5364
Pola	44.867	13.85	1906	-8.09973	54.5365
Pola	44.867	13.85	1907	-7.96647	54.5368
Pola	44.867	13.85	1908	-7.8715	54.537
Pola	44.867	13.85	1909	-7.76427	54.5372
Pola	44.867	13.85	1910	-7.63714	54.5375
Pola	44.867	13.85	1911	-7.4763	54.538
Pola	44.867	13.85	1912	-7.33935	54.7235
Pola	44.867	13.85	1913	-7.18013	54.724
Pola	44.867	13.85	1914	-7.0301	54.7246
Pola	44.867	13.85	1915	-6.88772	54.7252
Pola	44.867	13.85	1916	-6.58459	54.7266
Pola	44.867	13.85	1917	-6.58459	54.7266
Pola	44.867	13.85	1918	-6.45905	54.7272
Pola	44.867	13.85	1919	-6.31514	54.728
Pola	44.867	13.85	1921	-5.963	54.73
Pola	44.867	13.85	1922	-5.80071	54.731
Roma	41.9	12.45	1640	2.3941	63.6885
Roma	41.9	12.45	1640	2.3941	63.6885
Roma	41.9	12.45	1640	2.3941	63.6885
Roma	41.9	12.45	1640	1.45018	63.6587
Roma	41.9	12.45	1640	2.3941	63.6885
Roma	41.9	12.45	1640	1.45018	63.6587
Roma	41.9	12.45	1670	-2.80314	68.0709
Roma	41.9	12.45	1670	-2.80314	68.0709
Roma	41.9	12.45	1680	-5.55983	67.7899
Roma	41.9	12.45	1680	-5.55983	67.7899
Roma	41.9	12.45	1681	-5.55983	67.7899
Roma	41.9	12.45	1681	-5.55983	67.7899
Roma	41.9	12.45	1695	-8.31805	67.5255
Roma	41.9	12.45	1695	-8.31805	67.5255
Roma	41.9	12.45	1702	-10.0198	65.7777
Roma	41.9	12.45	1702	-10.0198	65.7777
Roma	41.9	12.45	1730	-10.9456	65.6926
Roma	41.9	12.45	1730	-10.9456	65.6926
Roma	41.9	12.45	1742	-15.1984	63.5831
Roma	41.9	12.45	1742	-15.1984	63.5831
Roma	41.9	12.45	1762	-15.478	63.5597
Roma	41.9	12.45	1762	-15.478	63.5597
Roma	41.9	12.45	1782	-16.1957	62.941
Roma	41.9	12.45	1782	-16.1957	62.941
Roma	41.9	12.45	1783	-16.1976	62.9782
Roma	41.9	12.45	1783	-16.1976	62.9782
Roma	41.9	12.45	1784	-16.2909	62.9705
Roma	41.9	12.45	1784	-16.2909	62.9705
Roma	41.9	12.45	1785	-16.3843	62.9628
Roma	41.9	12.45	1785	-16.3843	62.9628
Roma	41.9	12.45	1786	-16.4248	61.8205
Roma	41.9	12.45	1786	-16.4248	61.8205
Roma	41.9	12.45	1787	-16.4264	61.858
Roma	41.9	12.45	1787	-16.4264	61.858
Roma	41.9	12.45	1788	-15.5812	61.8804
Roma	41.9	12.45	1788	-15.5812	61.8804
Roma	41.9	12.45	1806	-16.4737	58.8558
Roma	41.9	12.45	1806	-16.4737	58.8558
Roma	41.9	12.45	1807	-16.3413	58.8582
Roma	41.9	12.45	1808	-16.1804	58.8611
Roma	41.9	12.45	1811	-16.2561	58.8597
Roma	41.9	12.45	1812	-16.1331	58.862
Roma	41.9	12.45	1833	-15.4856	58.5271
Roma	41.9	12.45	1833	-15.5519	58.5259
Roma	41.9	12.45	1834	-15.7982	58.5212
Roma	41.9	12.45	1838	-15.2306	57.0236
Roma	41.9	12.45	1840	-15.229	56.9801
Roma	41.9	12.45	1840	-15.226	56.8933
Roma	41.9	12.45	1850	-13.773	56.7063
Roma	41.9	12.45	1853	-13.3227	56.3795
Roma	41.9	12.45	1859	-13.0881	55.9719
Roma	41.9	12.45	1859	-13.0881	55.9719
Roma	41.9	12.45	1859	-13.0856	55.9067
Roma	41.9	12.45	1859	-13.0901	56.0262
Roma	41.9	12.45	1860	-12.9879	55.8437
Roma	41.9	12.45	1860	-12.9784	55.844
Roma	41.9	12.45	1861	-13.1659	56.0136
Roma	41.9	12.45	1870	-12.4531	55.5736
Roma	41.9	12.45	1870	-12.5476	55.5496
Roma	41.9	12.45	1870	-12.5095	55.5505
Roma	41.9	12.45	1870	-12.4983	55.5073
Roma	41.9	12.45	1871	-12.405	55.5639
Roma	41.9	12.45	1871	-12.347	55.5435
Roma	41.9	12.45	1872	-12.2185	55.427
Roma	41.9	12.45	1873	-12.2094	55.4381
Roma	41.9	12.45	1875	-11.8429	55.5883
Roma	41.9	12.45	1875	-11.595	55.5944
Roma	41.9	12.45	1876	-11.9436	55.4771
Roma	41.9	12.45	1876	-11.8768	55.4788
Roma	41.9	12.45	1876	-11.7243	55.4825
Roma	41.9	12.45	1877	-11.3046	55.4929
Roma	41.9	12.45	1877	-11.2188	55.4951
Roma	41.9	12.45	1878	-10.7248	55.3229
Roma	41.9	12.45	1878	-11.1542	55.312
Roma	41.9	12.45	1878	-11.4977	55.3033
Roma	41.9	12.45	1879	-11.1637	55.3117
Roma	41.9	12.45	1879	-11.5454	55.3022
Roma	41.9	12.45	1879	-11.3832	55.3062
Roma	41.9	12.45	1884	-10.4648	55.0363
Roma	41.9	12.45	1885	-10.3419	54.8331
Roma	41.9	12.45	1886	-10.519	54.9588
Roma	41.9	12.45	1887	-10.3246	55.116
Roma	41.9	12.45	1887	-10.3819	55.1145
Roma	41.9	12.45	1887	-10.5347	55.1105
Roma	41.9	12.45	1888	-10.3832	54.9081
Roma	41.9	12.45	1888	-10.3741	54.9192
Roma	41.9	12.45	1889	-10.2786	54.9217
Roma	41.9	12.45	1890	-10.2191	54.8689
Roma	41.9	12.45	1890	-10.2199	54.8906
Roma	41.9	12.45	1890	-10.2191	54.8689
Roma	41.9	12.45	1891	-10.1613	54.8596
Roma	41.9	12.45	1891	-10.1327	54.8604
Roma	41.9	12.45	1891	-10.1105	54.7849
Roma	41.9	12.45	1892	-10.0376	54.8738
Roma	41.9	12.45	1922	-6.4937	54.3896
Roma	41.9	12.45	1923	-6.49321	54.3788
Subiaco	41.92	13.09	1860	-13.7585	55.8368
Subiaco	41.92	13.09	1860	-13.2814	55.8436
Subiaco	41.92	13.09	1860	-13.1192	55.8459
Subiaco	41.92	13.09	1861	-12.9704	56.0107
Subiaco	41.92	13.09	1862	-12.9704	56.0107
Subiaco	41.92	13.09	1863	-12.7944	55.4385
Subiaco	41.92	13.09	1864	-12.7944	55.4385
Subiaco	41.92	13.09	1865	-12.718	55.4397
Subiaco	41.92	13.09	1865	-12.6798	55.4403
Subiaco	41.92	13.09	1865	-12.6321	55.441
Subiaco	41.92	13.09	1866	-12.3204	55.5868
Subiaco	41.92	13.09	1867	-12.0053	55.5917
Subiaco	41.92	13.09	1868	-12.0053	55.5917
Subiaco	41.92	13.09	1869	-11.841	55.5184
Subiaco	41.92	13.09	1872	-11.6792	55.5427
Subiaco	41.92	13.09	1889	-10.134	54.9619
Torino	45.4	7.73	1805	-15.5449	56.0685
Torino	45.4	7.73	1838	-16.5106	56.9947
Torino	45.4	7.73	1840	-16.0334	57.0944
Torino	45.4	7.73	1841	-16.0334	57.0944
Torino	45.4	7.73	1843	-15.5765	57.1335
Torino	45.4	7.73	1843	-15.6088	57.4306
Torino	45.4	7.73	1858	-13.993	56.0708
Torino	45.4	7.73	1860	-12.9357	55.4822
Torino	45.4	7.73	1862	-12.9156	55.5436
Torino	45.4	7.73	1867	-12.0066	55.5951
Torino	45.4	7.73	1868	-11.2662	55.6364
Torino	45.4	7.73	1871	-11.5007	56.2531
Torino	45.4	7.73	1873	-11.2779	56.1138
Torino	45.4	7.73	1873	-11.2496	55.8768
Torino	45.4	7.73	1875	-12.2977	56.1013
Torino	45.4	7.73	1876	-12.1064	56.1505
Torino	45.4	7.73	1876	-11.7961	56.1007
Torino	45.4	7.73	1877	-11.3728	56.0831
Torino	45.4	7.73	1878	-11.5876	56.0796
Torino	45.4	7.73	1879	-11.2474	56.0085
Torino	45.4	7.73	1880	-10.6471	56.0165
Torino	45.4	7.73	1881	-10.6457	56.0047
Torino	45.4	7.73	1882	-10.6236	55.9705
Torino	45.4	7.73	1882	-10.6279	56.006
Torino	45.4	7.73	1884	-10.3386	56.0632
Torino	45.4	7.73	1887	-12.0201	55.8695
Torino	45.4	7.73	1889	-9.95158	55.9849
Trieste	45.656	13.784	1812	-15.8514	59.2104
Trieste	45.656	13.784	1826	-15.9771	58.6666
Trieste	45.656	13.784	1838	-16.5039	57.4066
Trieste	45.656	13.784	1848	-13.2723	56.6698
Trieste	45.656	13.784	1854	-12.6174	56.4873
Trieste	45.656	13.784	1857	-12.4603	56.1578
Trieste	45.656	13.784	1867	-12.0059	55.7198
Trieste	45.656	13.784	1868	-11.2571	55.5614
Trieste	45.656	13.784	1870	-11.0583	55.5366
Trieste	45.656	13.784	1873	-10.7565	55.8751
Trieste	45.656	13.784	1890	-9.38653	55.0237
Trieste	45.656	13.784	1921	-6.11113	54.5802
Venezia	45.437	12.335	1640	3.92639	63.7655
Venezia	45.437	12.335	1783	-15.2936	62.9782
Venezia	45.437	12.335	1783	-15.2936	62.9782
Venezia	45.437	12.335	1815	-16.2246	58.6551
Venezia	45.437	12.335	1825	-16.0365	58.469
Venezia	45.437	12.335	1838	-16.4639	57.3364
Venezia	45.437	12.335	1840	-15.9869	57.0329
Venezia	45.437	12.335	1848	-13.8715	56.8311
Venezia	45.437	12.335	1854	-13.0552	56.4038
Venezia	45.437	12.335	1868	-11.2017	56.1772
Venezia	45.437	12.335	1873	-11.2425	55.9656
Venezia	45.437	12.335	1884	-10.2305	55.2165
Venezia	45.437	12.335	1887	-9.82841	55.0817
Venezia	45.437	12.335	1889	-9.84771	55.1284
Venezia	45.437	12.335	1890	-9.80152	55.0939
Venezia	45.437	12.335	1905	-8.61573	54.5386
Venezia	45.437	12.335	1921	-6.45853	54.7262
